# Supplementary material for: Functions of MiRNA-128 on the Regulation of Head and Neck Squamous Cell Carcinoma Growth and Apoptosis
Source: PubMed Central journal article supplement (PMC4357443; doi:10.1371/journal.pone.0116321), 2015-03-12
Supplement: pone.0116321.s001.pdf [file pone.0116321.s001.pdf]

## Supporting Information

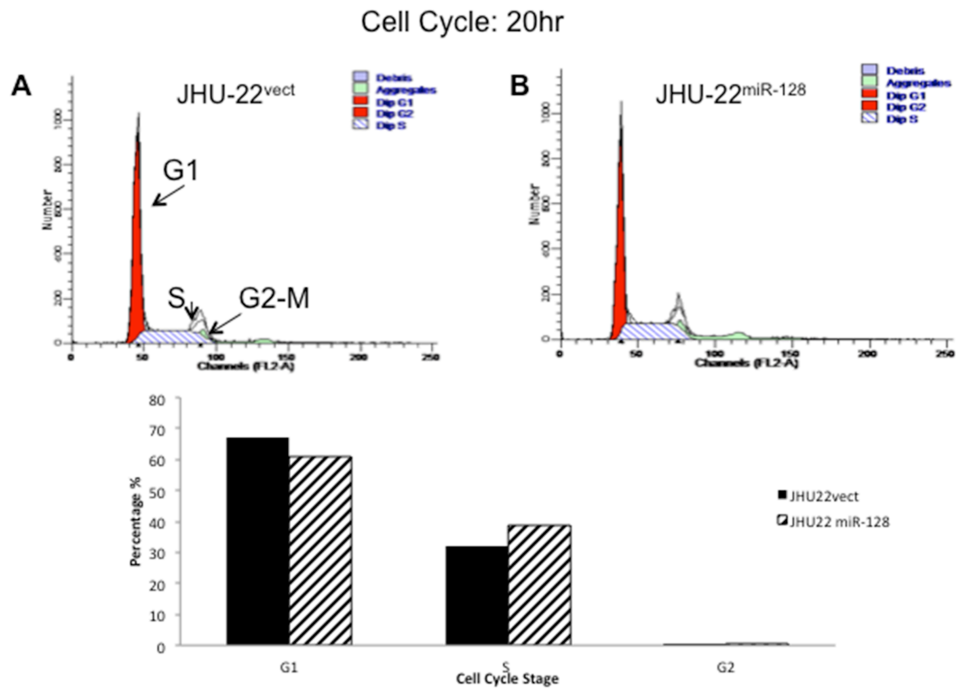

**Figure S1.**

### Cell Cycle Analysis JHU-22<sup>vect</sup> and JHU-22<sup>miR-128</sup> Cell Lines 20hrs.

Cell cycle was analyzed by flow cytometry after cells were treated with FBS 20 hours. The distributions of cells in G1, S, and G2 phases are shown for JHU-22<sup>vect</sup> (A) and (B) miRNA transfected JHU-22<sup>miR-128</sup> cell lines. The results represent the mean  $\pm$  SD from independent experiments performed in triplicate.
